# Supplementary material for: Titanium nitride coating to enhance the performance of silicon nanoparticles as a lithium-ion battery anode
Source: Royal Society of Chemistry journal article supplement (doi:10.1039/c4ta01343c), 2014-01-01
Supplement: c4ta01343c1.pdf [file c4ta01343c1.pdf]

**[Electronic Supplementary Information]**

**Titanium Nitride Coating to Enhance the Performance of Silicon Nanoparticles as a Lithium-Ion Battery Anode**

Duihai Tang, Ran Yi, Mikhail L. Gordin, Michael Melnyk, Fang Dai, Shuru Chen, Jiangxuan Song and Donghai Wang\*

Department of Mechanical and Nuclear Engineering, The Pennsylvania State University, University Park, Pennsylvania 16802, United States.

\* To whom correspondence should be addressed. Tel: +1 814 863 1287

E-mail: [dwang@psu.edu](mailto:dwang@psu.edu)

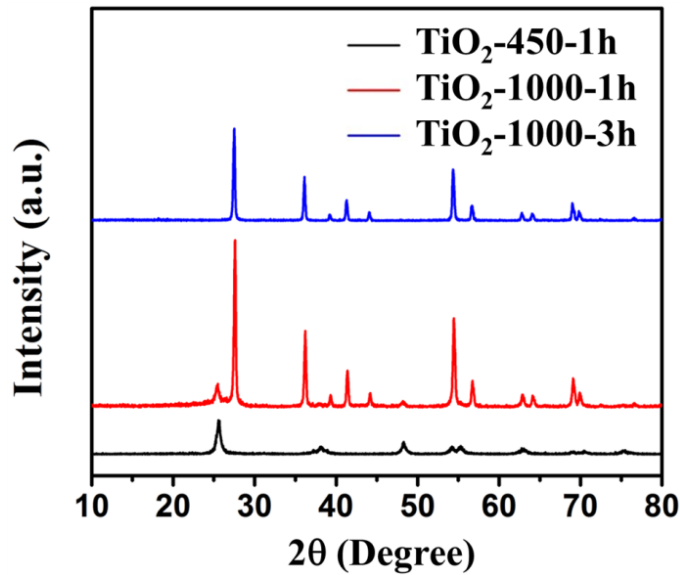

**Fig. S1.** XRD patterns of TiO<sub>2</sub>-450-1h, TiO<sub>2</sub>-1000-1h, and TiO<sub>2</sub>-1000-3h.

To demonstrate that the silicon can act as the catalyst, we synthesized the TiO<sub>2</sub> through the same procedure of Si@TiO<sub>2</sub>, but without the addition of silicon. This TiO<sub>2</sub> was thermally annealed in a tube furnace at 450 °C for 1 h under nitrogen stream, this material was named TiO<sub>2</sub>-450-1h. And then TiO<sub>2</sub>-450-1h was annealed at 1000 °C for 1h and 3 h, respectively under nitrogen stream, these two samples were named TiO<sub>2</sub>-1000-1h and TiO<sub>2</sub>-1000-3h, respectively. As shown in Figure 1S, all the peaks of TiO<sub>2</sub>-450-1h can be assigned to the anatase phases and all the peaks of TiO<sub>2</sub>-1000-3h can be assigned to the rutile phases. We can draw a conclusion that, the TiO<sub>2</sub> could not react with N<sub>2</sub> to form the TiN without the silicon at 1000 °C. The overall reaction to form TiN at 1000 °C is denoted in the following equations:<sup>S1</sup>

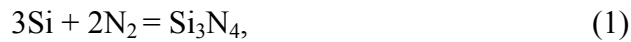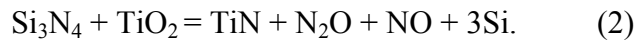

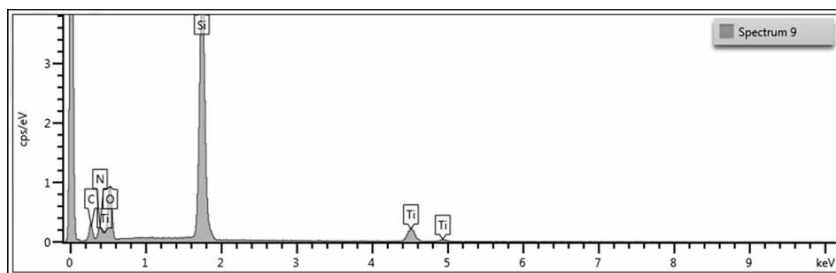

**Fig. S2.** EDS spectrum of Si@TiN.

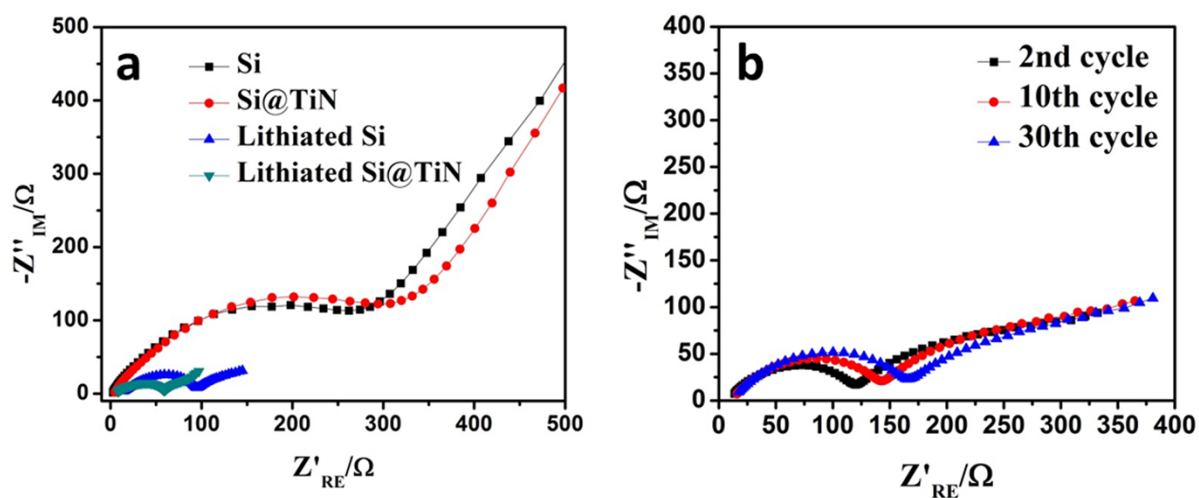

**Fig. S3.** (a) Nyquist plots of Li-ion cells using Si and Si@TiN electrodes at open circuit potential of approximately 2.90 V (vs. Li<sup>+</sup>/Li) and using lithiated Si and lithiated Si@TiN electrodes after the initial discharge to the potential of approximately 0.05 V (vs. Li<sup>+</sup>/Li). (b) Nyquist plots of Li-ion cells using Si@TiO<sub>2</sub> electrodes for cycles at 2nd, 10th and 30th.

## References

S1 Yu. F. Kargin, S. N. Ivicheva, A. S. Lysenkov, N. A. Ovsyannikov, L. I. Shvorneva and K. A. Solntsev, *Inorg. Mater.* 2012, **48**, 897-902.
